# Supplementary material
Source: Springer Nature journal article supplement (https://www.springermedizin.de/resource/supplementary/12936_2012_2182_MOESM1_ESM.pdf/9542588)

# Ordering of Chemical Actions

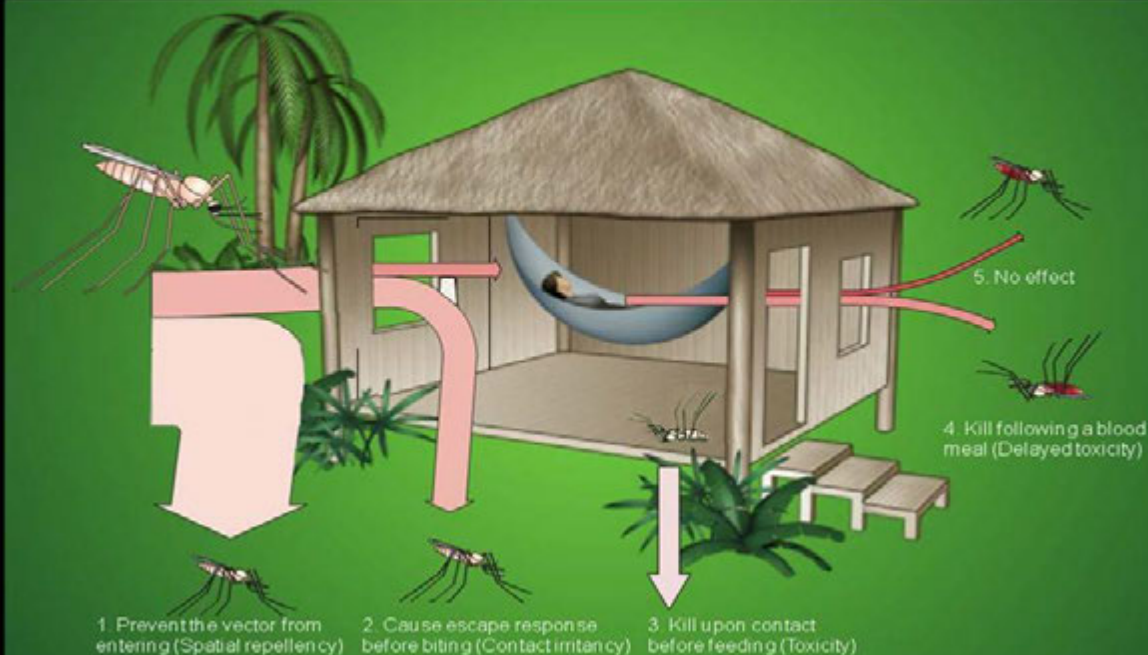

Supplement: MOESM1 [file 9542588]
